# Supplementary material
Source: MDPI journal article supplement (https://www.mdpi.com/2077-1312/11/3/672)
Supplement: s1 [file s1]

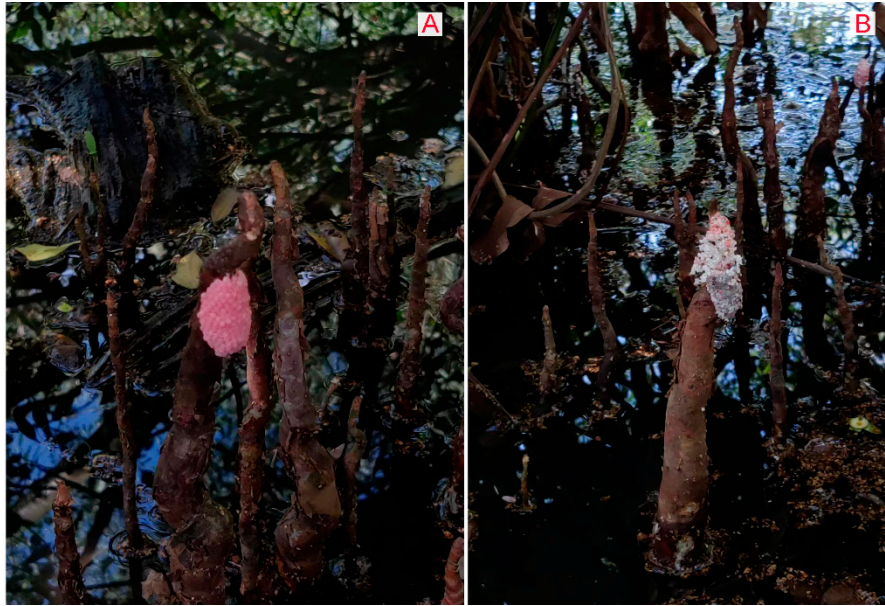

Supplementary Figure S1 Newly laid egg clusters (A) and hatched eggs clusters (B) of apple snails in a mangrove forest (22°62'N, 113°66'E)

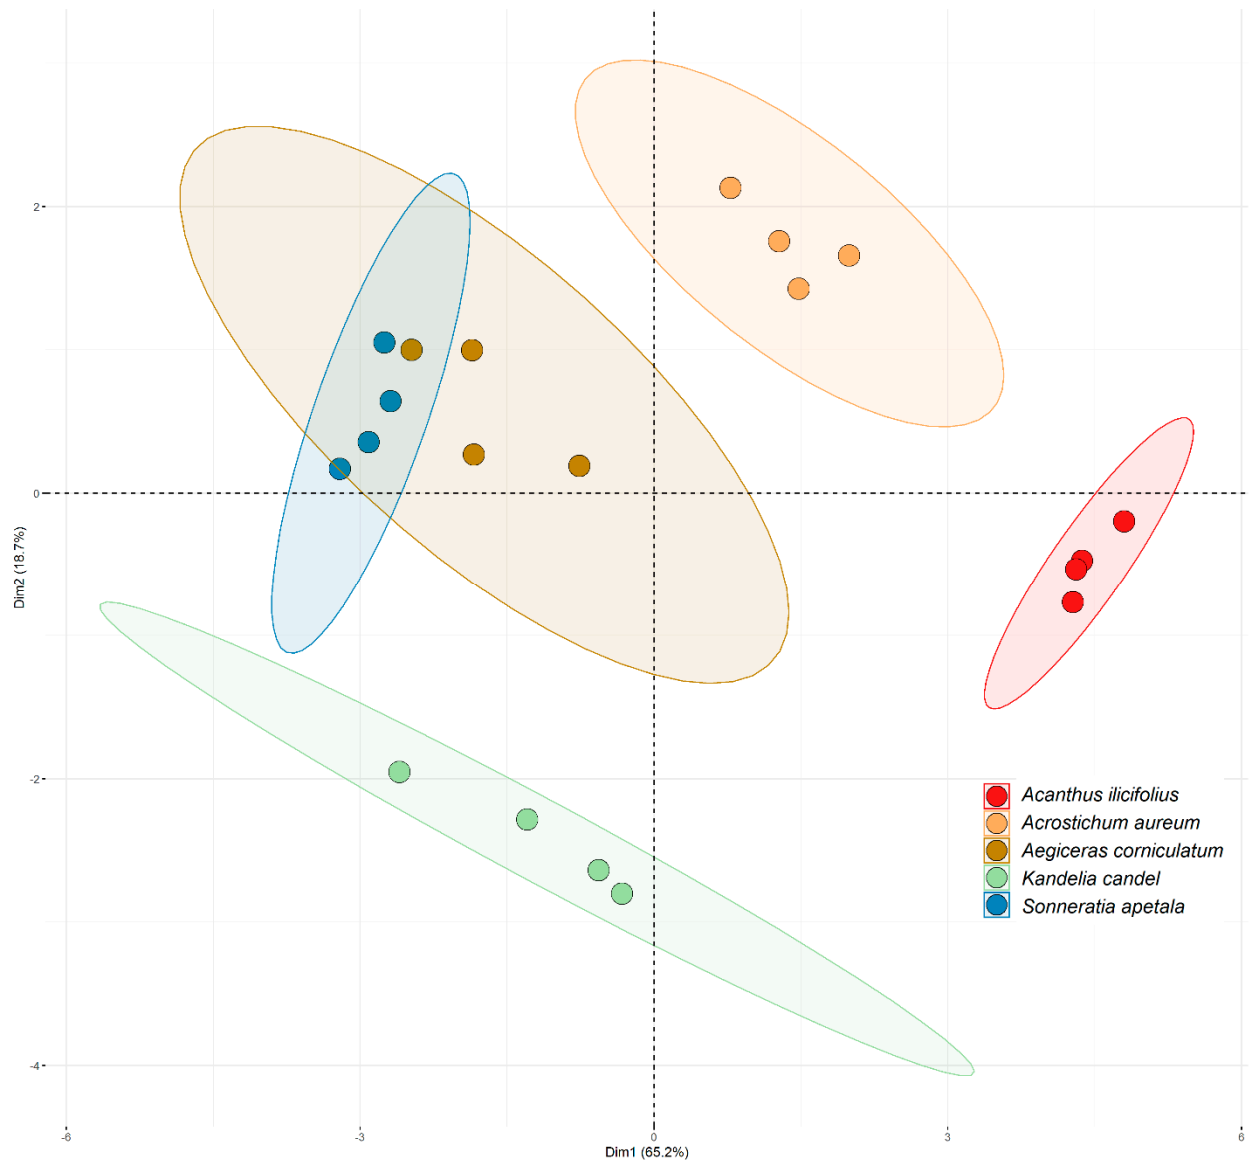

Supplementary Figure S2 Principal component analysis between chemical characteristics of decaying leaf litter of five mangroves and feeding indicators of *Pomacea canaliculata*.

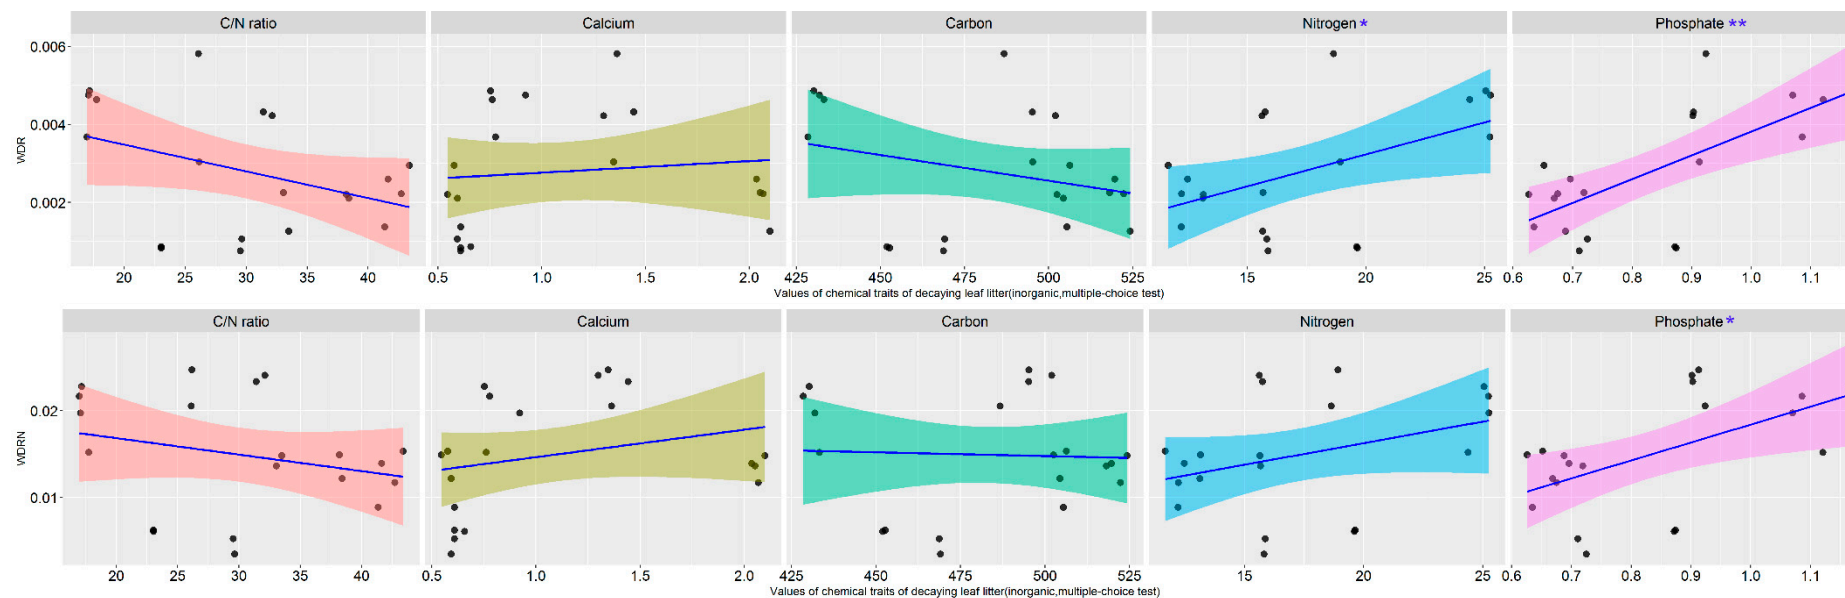

Supplementary Figure S3 Linear regression of inorganic components of chemical characteristics of decaying leaf litter and feeding indicators of *P. canaliculata*; \*\*  $p < 0.01$ ; \*  $p < 0.05$ ; WDR- weight-specific daily feeding rate in the multiple-choice condition; WDRN- weight-specific daily feeding rate in the no-choice condition.

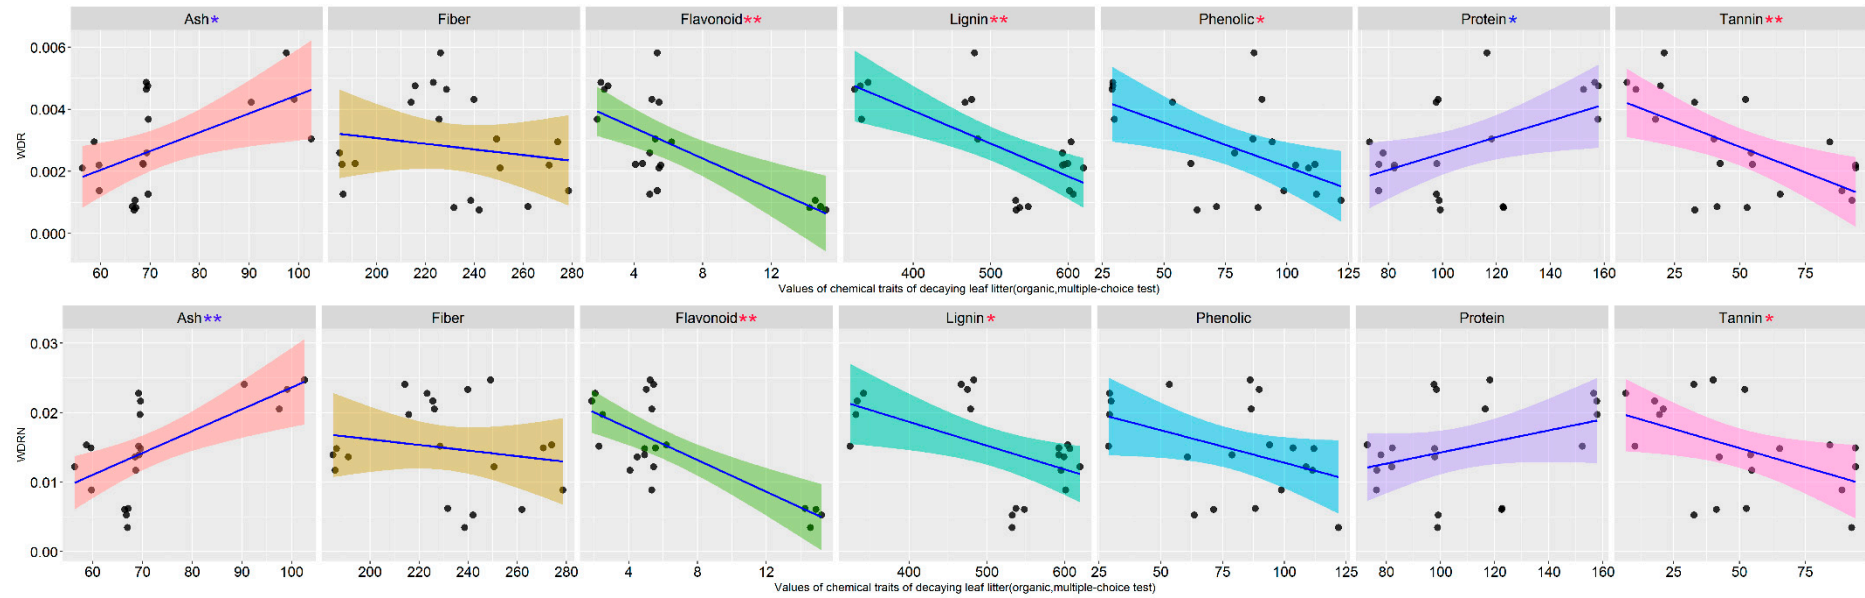

Supplementary Figure S4 Linear regression of organic components of chemical characteristics of decaying leaf litter and feeding indicators of *P. canaliculata*; \*\*  $p < 0.01$ ; \*  $p < 0.05$ ; WDR- weight-specific daily feeding rate in the multiple-choice condition; WDRN- weight-specific daily feeding rate in the no-choice condition.
