# Supplementary material
Source: MDPI journal article supplement (https://www.mdpi.com/2077-1312/11/3/672)
Supplement: s1 [file s1]

**Supplementary Table S1 Linear regression parameters of inorganic chemical characteristics of decaying leaf litter and feeding indicators of *Pomacea canaliculata***

| Indicator<br>(y=)<br>(g g <sup>-1</sup> d <sup>-1</sup> ) | C/N ratio                                              | Calcium (%)                                           | Carbon (g kg <sup>-1</sup> )                            | Nitrogen (g kg <sup>-1</sup> )                                             | Phosphate (g kg <sup>-1</sup> )                                          |
|-----------------------------------------------------------|--------------------------------------------------------|-------------------------------------------------------|---------------------------------------------------------|----------------------------------------------------------------------------|--------------------------------------------------------------------------|
| WDR                                                       | -0.0001*x+0.0049<br>R <sup>2</sup> =0.1566<br>P=0.0842 | 0.0003*x+0.0025<br>R <sup>2</sup> =0.0120<br>P=0.6462 | -0.00001*x+0.0092<br>R <sup>2</sup> =0.0806<br>P=0.2251 | <b>0.0002*x-0.00005</b><br><b>R<sup>2</sup>= 0.2357</b><br><b>P=0.0300</b> | <b>0.0061*x-0.0023</b><br><b>R<sup>2</sup>=0.4692</b><br><b>P=0.0009</b> |
| WDRN                                                      | -0.0002*x+0.0206<br>R <sup>2</sup> =0.0659<br>P=0.2748 | 0.0032*x+0.0115<br>R <sup>2</sup> =0.0757<br>P=0.2405 | -0.00001*x+0.0191<br>R <sup>2</sup> =0.0019<br>P=0.855  | 0.0005*x+0.0063<br>R <sup>2</sup> =0.1189<br>P=0.1366                      | <b>0.0207*x-0.0023</b><br><b>R<sup>2</sup>=0.2961</b><br><b>P=0.0131</b> |

Note: x -the values of characteristics of decaying leaf litter; y-the values of indicators; The significant value (P<0.05 or 0.01) is in bold font.

Ei- Ivlev's electivity indicator; WDR- weight-specific daily feeding rate in the multiple-choice condition; WDRN- weight-specific daily feeding rate in the no-choice condition.

**Supplementary Table S2 Linear regression parameters of organic chemical characteristics of decaying leaf litter and feeding**

**indicators of *Pomacea canaliculata***

| Indicator<br>(y=)<br>(g g <sup>-1</sup> d <sup>-1</sup> ) | Ash<br>(g kg <sup>-1</sup> )                                             | Fiber<br>(g kg <sup>-1</sup> )                         | Flavonoid<br>(g kg <sup>-1</sup> )                                        | Lignin<br>(g kg <sup>-1</sup> )                                            | Phenolic<br>(g kg <sup>-1</sup> )                                         | Protein<br>(g kg <sup>-1</sup> )                                           | Tannin<br>(g kg <sup>-1</sup> )                                            |
|-----------------------------------------------------------|--------------------------------------------------------------------------|--------------------------------------------------------|---------------------------------------------------------------------------|----------------------------------------------------------------------------|---------------------------------------------------------------------------|----------------------------------------------------------------------------|----------------------------------------------------------------------------|
| WDR                                                       | <b>0.0001*x-0.0016</b><br><b>R<sup>2</sup>=0.2815</b><br><b>P=0.0161</b> | 0.00001*x+0.0049<br>R <sup>2</sup> =0.0285<br>P=0.4771 | <b>-0.0002*x+0.0044</b><br><b>R<sup>2</sup>=0.486</b><br><b>P=0.0006</b>  | <b>-0.00001*x+0.0082</b><br><b>R<sup>2</sup>=0.4833</b><br><b>P=0.0007</b> | <b>-0.00003*x+0.005</b><br><b>R<sup>2</sup>=0.3048</b><br><b>P=0.0116</b> | <b>0.00003*x-0.00005</b><br><b>R<sup>2</sup>=0.2357</b><br><b>P=0.0300</b> | <b>-0.00003*x+0.0044</b><br><b>R<sup>2</sup>=0.3669</b><br><b>P=0.0046</b> |
| WDRN                                                      | <b>0.0003*x-0.0078</b><br><b>R<sup>2</sup>=0.4145</b><br><b>P=0.0022</b> | -0.00004*x+0.0243<br>R <sup>2</sup> =0.031<br>P=0.4573 | <b>-0.0011*x+0.0223</b><br><b>R<sup>2</sup>=0.5707</b><br><b>P=0.0001</b> | <b>-0.00003*x+0.0324</b><br><b>R<sup>2</sup>=0.278</b><br><b>P=0.0169</b>  | -0.0001*x+0.0222<br>R <sup>2</sup> =0.1809<br>P=0.0615                    | -0.0001*x+0.0063<br>R <sup>2</sup> =0.1189<br>P=0.1366                     | <b>-0.0001*x+0.0203</b><br><b>R<sup>2</sup>=0.2249</b><br><b>P=0.0346</b>  |

Note: x -the values of chemical characteristics of decaying leaf litter; y-the values of indicators; The significant value (P < 0.05 or 0.01) is in bold font.  
 Ei- Ivlev's electivity indicator; WDR- weight-specific daily feeding rate in the multiple-choice condition; WDRN- weight-specific daily feeding rate in the no-choice condition.
