# Supplementary material
Source: MDPI journal article supplement (https://www.mdpi.com/2077-1312/11/3/672)
Supplement: s1 [file s1]

Archive with 2 entries (2 files):
- supplementary figures-2023-02-28.pdf
- supplementary tables 2023-02-28.pdf
